# Supplementary material for: Theoretical design of asymmetric A–D1A′D2–A type non-fullerene acceptors for organic solar cells
Source: Royal Society of Chemistry journal article supplement (doi:10.1039/d1cp01155c), 2021-01-01
Supplement: d1cp01155c1.pdf [file d1cp01155c1.pdf]

## Supporting Information for

# Theoretical design of asymmetric A-D<sub>1</sub>A'D<sub>2</sub>-A acceptors for organic solar cells

*Jie Yang, Quan-Song Li\*, and Ze-Sheng Li\**

Key Laboratory of Cluster Science of Ministry of Education, Beijing Key Laboratory of Photoelectronic/Electrophotonic Conversion Materials, School of Chemistry and chemical engineering, Beijing Institute of Technology, Beijing 100081, China.

E-mail: liquansong@bit.edu.cn, zeshengli@bit.edu.cn

## Contents

|                                                                                                              |     |
|--------------------------------------------------------------------------------------------------------------|-----|
| <b>Figure S1</b> The calculated $E_{\text{LUMO}}$ using different functionals.....                           | SI1 |
| <b>Figure S2</b> The charge difference density (CDD) maps of the 5 lowest excited states.....                | SI2 |
| <b>Figure S3</b> The fragment 1 and fragment 2 of studied molecules.....                                     | SI3 |
| <b>Figure S4</b> The grid-like packing of the studied molecules.....                                         | SI4 |
| <b>Figure S5</b> The electrostatic potential map (ESP) of the studied acceptors.....                         | SI5 |
| <b>Table S1</b> The amount of charge transfer of the studied molecules.....                                  | SI6 |
| <b>Table S2</b> The HOMO level of acceptors and the differences of HOMO level between PM6 and acceptors..... | SI7 |

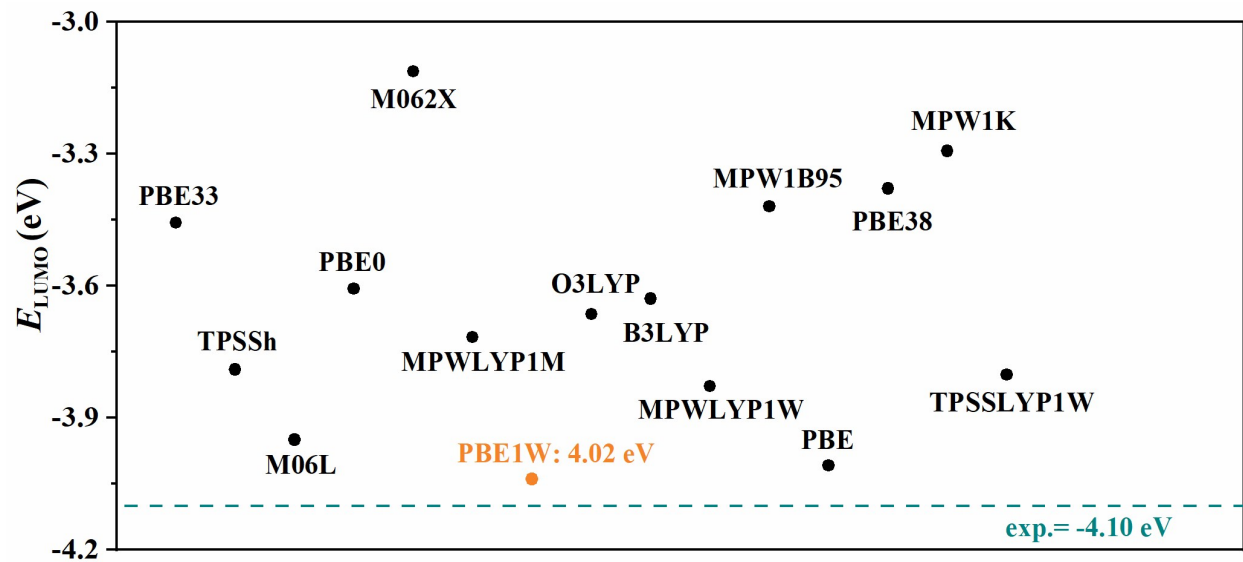

**Figure S1.** The calculated energy of LUMO ( $E_{LUMO}$ , eV) of acceptor Y6 using different DFT functionals and the experiment  $E_{LUMO}$  of Y6.<sup>1</sup>

1. J. Yuan, Y. Zhang, L. Zhou, G. Zhang, H.-L. Yip, T.-K. Lau, X. Lu, C. Zhu, H. Peng, P. A. Johnson, M. Leclerc, Y. Cao, J. Ulanski, Y. Li and Y. Zou, *Joule*, 2019, **3**, 1140-1151.

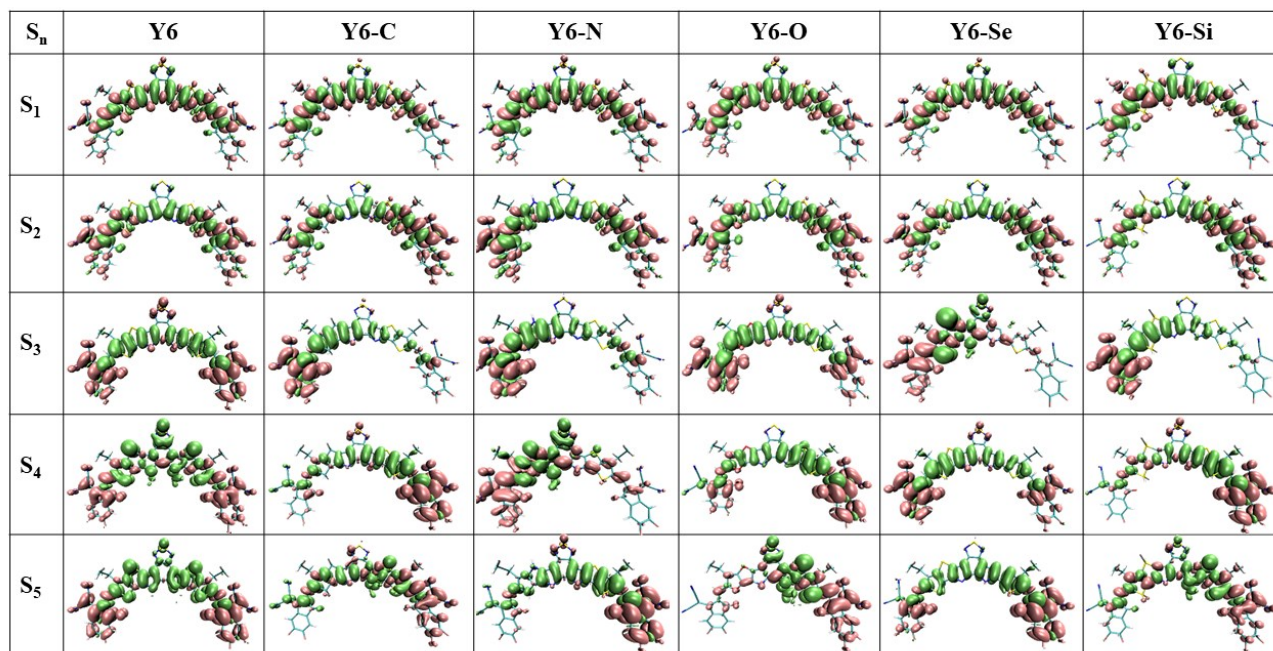

**Figure S2.** The charge difference density (CDD) maps of the five lowest excited states for the investigate acceptors at TD-CAM-B3LYP /6-311G (d, p) level.

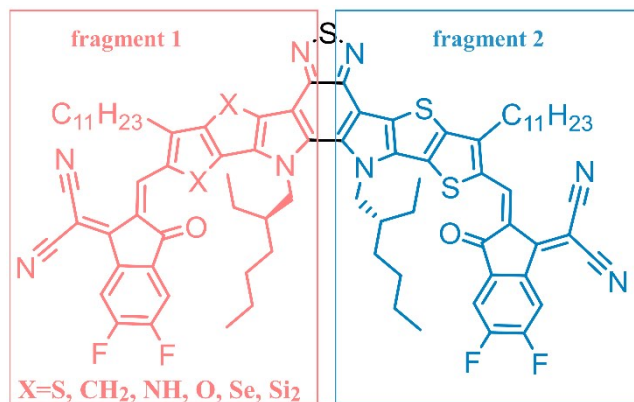

**Figure S3.** The fragment 1 and fragment 2 of studied molecules.

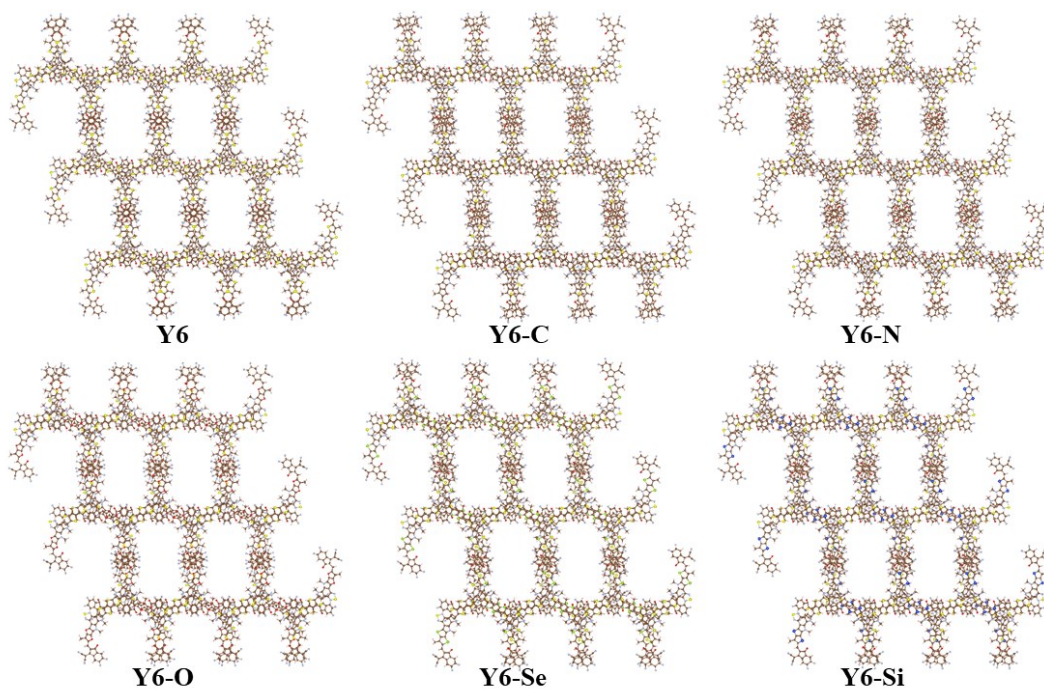

**Figure S4.** The grid-like packing of the studied molecules (the long branched side chains have been omitted for the sake of clarity).

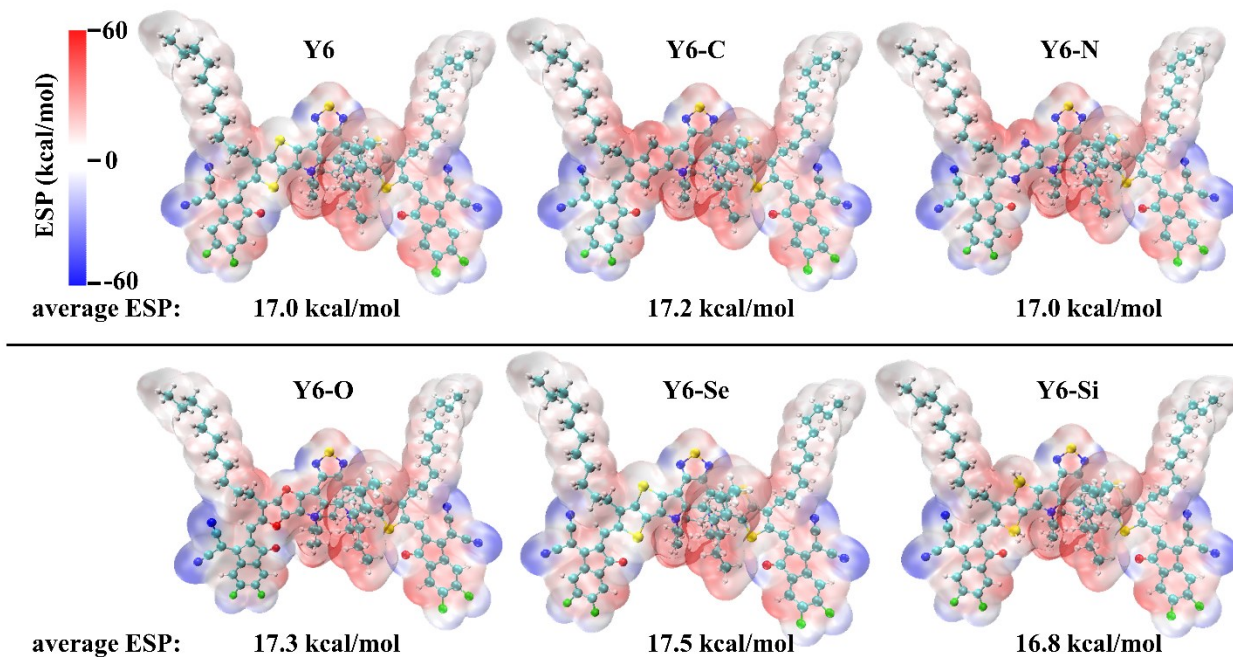

**Figure S5.** The electrostatic potential (ESP) mapped onto a surface of total electrons for the Y6 and the newly designed acceptors.

**Table S1.** The amount of charge transferring from fragment 1 to fragment 2 for the lowest 20 excited states of the studied molecules.

| $S_n$    | Y6/ e | Y6-C/ e | Y6-N/ e | Y6-O/ e | Y6-Se/ e | Y6-Si/ e |
|----------|-------|---------|---------|---------|----------|----------|
| $S_1$    | 0.00  | 0.02    | 0.07    | 0.01    | -0.01    | -0.03    |
| $S_2$    | 0.00  | 0.07    | 0.02    | 0.02    | 0.02     | 0.07     |
| $S_3$    | 0.00  | -0.04   | -0.04   | -0.04   | 0.06     | -0.06    |
| $S_4$    | 0.00  | 0.09    | 0.10    | 0.04    | -0.04    | 0.02     |
| $S_5$    | 0.00  | 0.21    | 0.10    | -0.06   | 0.04     | -0.01    |
| $S_6$    | 0.00  | -0.01   | 0.03    | -0.04   | -0.04    | -0.11    |
| $S_7$    | 0.02  | 0.03    | 0.29    | 0.13    | 0.00     | 0.06     |
| $S_8$    | 0.00  | 0.02    | 0.10    | 0.02    | 0.02     | 0.14     |
| $S_9$    | -0.01 | -0.06   | 0.13    | -0.03   | 0.03     | -0.12    |
| $S_{10}$ | -0.01 | 0.01    | 0.01    | 0.00    | 0.04     | 0.04     |
| $S_{11}$ | 0.01  | -0.01   | -0.01   | -0.01   | -0.01    | -0.02    |
| $S_{12}$ | 0.00  | 0.07    | 0.06    | 0.00    | 0.01     | -0.01    |
| $S_{13}$ | 0.00  | 0.00    | 0.09    | 0.03    | 0.12     | 0.06     |
| $S_{14}$ | -0.01 | 0.11    | 0.07    | -0.08   | 0.02     | -0.10    |
| $S_{15}$ | 0.00  | 0.02    | 0.05    | -0.02   | 0.05     | -0.01    |
| $S_{16}$ | 0.04  | 0.26    | 0.06    | -0.11   | -0.11    | -0.05    |
| $S_{17}$ | -0.07 | -0.08   | 0.13    | 0.02    | 0.13     | -0.40    |
| $S_{18}$ | 0.05  | -0.03   | 0.25    | 0.19    | -0.08    | -0.30    |
| $S_{19}$ | 0.02  | 0.04    | 0.14    | 0.12    | -0.03    | -0.05    |
| $S_{20}$ | -0.03 | -0.02   | -0.02   | -0.02   | -0.01    | 0.35     |

**Table S2.** The HOMO level  $E_{\text{HOMO}}$  (eV) of acceptors and the differences of HOMO level  $\Delta E_{\text{HOMO}}$  (eV) between PM6 and acceptors.

| molecule | $E_{\text{HOMO}}$ (eV) | $\Delta E_{\text{HOMO}}$ (eV) |
|----------|------------------------|-------------------------------|
| PM6      | -5.56                  | -                             |
| Y6       | -5.20                  | -0.36                         |
| Y6-C     | -5.01                  | -0.55                         |
| Y6-N     | -5.01                  | -0.55                         |
| Y6-O     | -5.19                  | -0.37                         |
| Y6-Se    | -5.18                  | -0.38                         |
| Y6-Si    | -5.13                  | -0.43                         |
